# Supplementary material for: Mutations in NOTCH1 cause aortic valve disease
Source: Springer Nature journal article supplement (doi:10.1038/nature03940), 2005-07-17
Supplement: nature03940-s4.pdf [file nature03940-s4.pdf]

### Supplementary Figure 3

| NOTCH1 Genetic Abnormality | Ethnicity of Identified Family | Overall SNP Frequency in Control Population | Ethnicity                                                  | SNP Frequency by Ethnicity      |
|----------------------------|--------------------------------|---------------------------------------------|------------------------------------------------------------|---------------------------------|
| <i>R1108X</i>              | European-American (Family A)   | 0/1136                                      | European-American<br>African-American<br>Hispanic<br>Other | 0/349<br>0/543<br>0/217<br>0/27 |
| <i>H1505del</i>            | Hispanic (Family B)            | 0/1138                                      | European-American<br>African-American<br>Hispanic<br>Other | 0/350<br>0/544<br>0/217<br>0/27 |
